# Supplementary material
Source: publisher site journal article supplement (https://www.spandidos-publications.com/5770/downloadSupplementary)

Figure S1. Identity of cultured smooth muscle cell verified by  $\alpha$ -SMA and SM22 $\alpha$  IF staining. (A) IF staining of  $\alpha$ -SMA. Scale bar, 100  $\mu$ m. (B) IF staining of SM22 $\alpha$ . Scale bar, 50  $\mu$ m. DAPI, 4',6-diamidino-2-phenylindole;  $\alpha$ -SMA, smooth muscle  $\alpha$ -actin; SM22 $\alpha$ , smooth muscle protein 22- $\alpha$ ; IF, immunofluorescence.

A

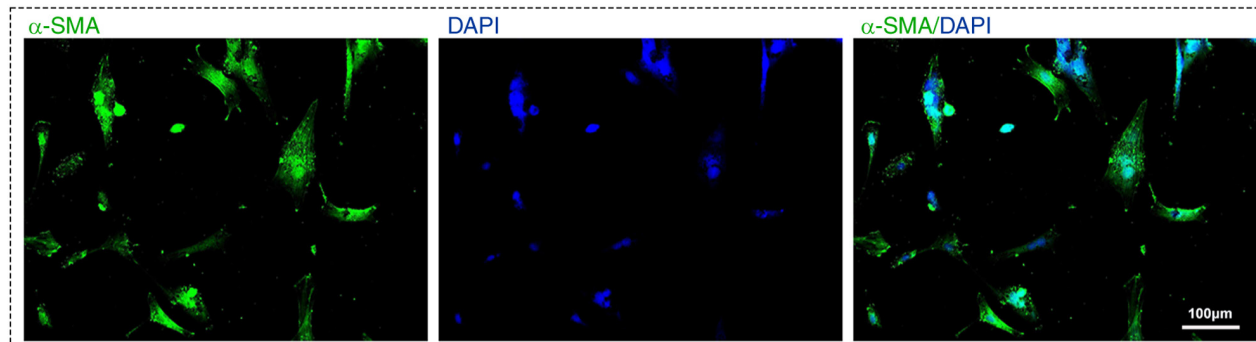

B

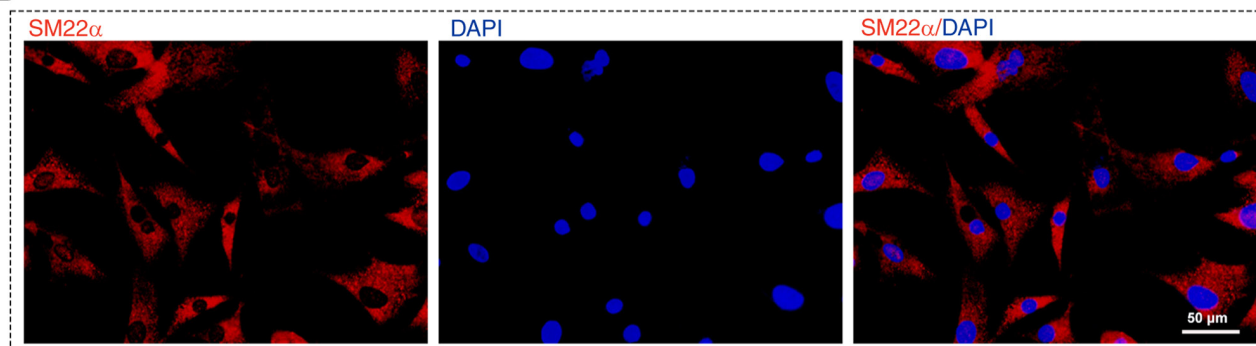

Figure S2. Proof of infection success. SPINT2 (A) mRNA and (B) protein expression levels in adenovirus-infected cells were detected to confirm transduction efficiency. \*\*\*P<0.001. SPINT2, serine peptidase inhibitor Kunitz type 2.

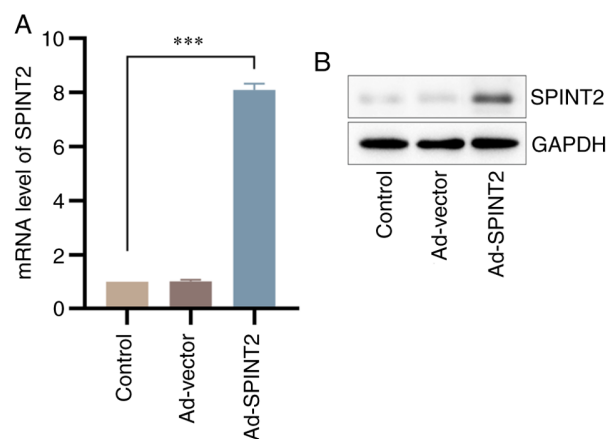

Figure S3. SPINT2 overexpression has no significant effects on SMC viability or phenotypic switching. (A) The SMC viability at 48 h was detected using the 3-(4,5-dimethylthiazol-2-yl)-2,5-diphenyltetrazolium bromide assay. (B) The expression levels of the synthetic proteins (vimentin and collagen I) were detected by western blotting. (C) The expression levels of the contractile proteins ( $\alpha$ -SMA and SM22 $\alpha$ ) were detected by western blotting.  $\alpha$ -SMA, smooth muscle  $\alpha$ -actin; SM22 $\alpha$ , smooth muscle protein 22- $\alpha$ ; SPINT2, serine peptidase inhibitor Kunitz type 2; SMC, smooth muscle cell; Ad, adenovirus.

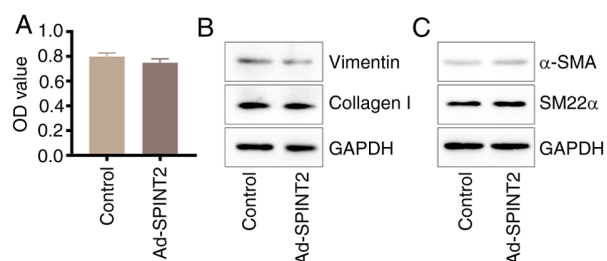

Figure S4. Effects of SPINT2 on the protein level of PDGFR $\beta$ . \*\*P<0.01 vs. control group. ##P<0.01 vs. PDGF-BB + Ad-vector group. PDGF-BB, platelet-derived growth factor BB; SPINT2, serine peptidase inhibitor Kunitz type 2; PDGFR  $\beta$ , PDGF receptor  $\beta$ ; Ad, adenovirus.

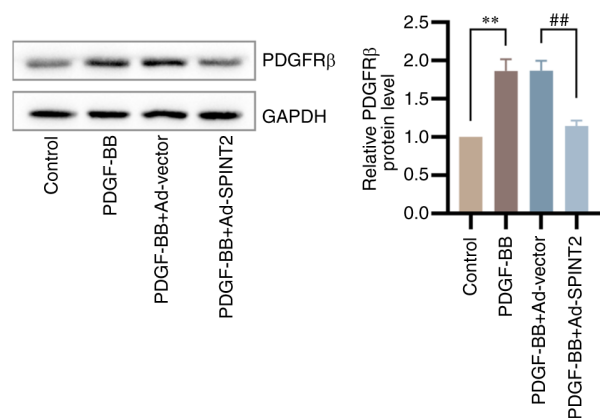

Supplement: Supplementary file 1 [file downloadSupplementary]
